# Supplementary material for: Effects of Antioxidant Vitamins, Curry Consumption, and Heavy Metal Levels on Metabolic Syndrome with Comorbidities: A Korean Community-Based Cross-Sectional Study
Source: MDPI journal article supplement (doi:10.3390/antiox10050808), 2021-05-19
Supplement: s1 [file s1]

**Effects of antioxidant vitamins, curry consumption and heavy metal levels on the metabolic syndrome with comorbidities: a Korean community-based cross-sectional study**

Hai Nguyen Duc, MD <sup>1</sup>, Hojin Oh, PharmD <sup>1</sup>, Min-Sun Kim, PhD <sup>1</sup>

<sup>1</sup>Department of Pharmacy, College of Pharmacy and Research Institute of Life and Pharmaceutical Sciences, Sunchon National University, Sunchon, Jeonnam, Republic of Korea

**Corresponding author:**

Prof. Min-Sun Kim PhD,

Department of Pharmacy, College of Pharmacy, Sunchon National University, Sunchon 57922, Republic of Korea,

Email: [minsun@scnu.ac.kr](mailto:minsun@scnu.ac.kr).

Tel: +821025101635

## Supplementary material

**Table S1.** Adjusted ORs for serum lead (Pb).

| <b>Metabolic Syndrome</b>                                | <b>Odds ratio</b> | <b>95% Confident Interval</b> |        | <b>p-value</b> |
|----------------------------------------------------------|-------------------|-------------------------------|--------|----------------|
| <b>Serum Pb</b> ( $\mu\text{g/L}$ )                      | 1.144             | 1.026                         | 1.276  | 0.015          |
| <b>Monthly household income</b><br>( $<2,000$ )          | 1 (refer)         | .                             | .      | .              |
| $\geq 2,000$ and $< 4,000$                               | 0.976             | 0.734                         | 1.299  | 0.869          |
| $\geq 4,000$ and $< 6,000$                               | 0.854             | 0.619                         | 1.179  | 0.337          |
| $\geq 6,000$                                             | 0.727             | 0.513                         | 1.030  | 0.073          |
| <b>Residential areas</b> ( <i>urban</i> )                | 1                 | .                             | .      | .              |
| <i>Rural</i>                                             | 1.171             | 0.890                         | 1.541  | 0.258          |
| <b>Energy</b> ( <i>Kcal</i> )                            | 1.000             | 1.000                         | 1.000  | 0.099          |
| <b>Age group</b> ( <i>29 years</i> )                     | 1                 | .                             | .      | .              |
| <i>30-39</i>                                             | 2.233             | 1.328                         | 3.753  | 0.002          |
| <i>40-49</i>                                             | 5.697             | 3.494                         | 9.289  | $<0.001$       |
| <i>50-59</i>                                             | 6.504             | 3.897                         | 10.854 | $<0.001$       |
| <i>&gt;60</i>                                            | 7.738             | 4.389                         | 13.643 | $<0.001$       |
| <b>Occupation</b>                                        | 1                 | .                             | .      | .              |
| ( <i>Managers, professional</i> )                        |                   |                               |        |                |
| <i>Office worker, clerical workers</i>                   | 0.965             | 0.619                         | 1.504  | 0.876          |
| <i>Service workers, sales workers</i>                    | 0.974             | 0.649                         | 1.462  | 0.900          |
| <i>Agriculture, forestry and fishing workers</i>         | 0.761             | 0.424                         | 1.366  | 0.361          |
| <i>Craft, plant and machine operators and assemblers</i> | 0.585             | 0.364                         | 0.940  | 0.027          |
| <i>Elementary occupations</i>                            | 0.791             | .49                           | 1.275  | 0.336          |
| <i>Unemployed</i>                                        | 0.906             | .626                          | 1.311  | 0.599          |
| <b>Sex</b> ( <i>male</i> )                               | 1                 | .                             | .      | .              |
| <i>Female</i>                                            | 3.980             | 2.897                         | 5.467  | $<0.001$       |
| <b>Family history of CVDs</b> ( <i>no</i> )              | 1                 | .                             | .      | .              |
| <i>Yes</i>                                               | 1.251             | 1.008                         | 1.552  | 0.042          |
| <b>Family history of type 2 diabetes</b> ( <i>no</i> )   | 1                 | .                             | .      | .              |
| <i>Yes</i>                                               | 1.146             | 0.979                         | 1.342  | 0.090          |
| <b>Family history of hyperlipidemia</b> ( <i>no</i> )    | 1                 | .                             | .      | .              |
| <i>Yes</i>                                               | 1.130             | 0.755                         | 1.690  | 0.553          |

|                                        |        |        |         |        |
|----------------------------------------|--------|--------|---------|--------|
| <b>BMI group</b> (<18.5)               | 1      | .      | .       | .      |
| ≥ 18.5 and < 25                        | 4.488  | 1.227  | 16.418  | 0.023  |
| ≥ 25 and < 30                          | 22.784 | 6.206  | 83.65   | <0.001 |
| ≥ 30                                   | 56.738 | 14.795 | 217.585 | <0.001 |
| <b>Smoking status</b> (non/ex-smoker)  | 1      | .      | .       | .      |
| Current smoker                         | 1.194  | 0.875  | 1.630   | 0.264  |
| <b>High risk drinking</b> (no)         | 1      | .      | .       | .      |
| Yes                                    | 0.951  | 0.689  | 1.313   | 0.760  |
| <b>Physical activity</b> (Not regular) | 1      | .      | .       | .      |
| Regular                                | 0.857  | 0.666  | 1.103   | 0.232  |
| <b>Education level</b>                 | 1      | .      | .       | .      |
| (≤ Middle school)                      |        |        |         |        |
| High school                            | 0.857  | 0.666  | 1.103   | 0.232  |
| ≥ College                              | 0.857  | 0.666  | 1.103   | 0.232  |
| <b>Hypertension</b> (no)               | 1      | .      | .       | .      |
| yes                                    | 3.646  | 2.724  | 4.88    | <0.001 |
| <b>Dyslipidemia</b> (no)               | 1      | .      | .       | .      |
| Yes                                    | 2.288  | 1.695  | 3.088   | <0.001 |
| <b>Diabetes</b> (no)                   | 1      | .      | .       | .      |
| Yes                                    | 3.131  | 2.031  | 4.826   | <0.001 |
| <b>Stroke</b> (no)                     | 1      | .      | .       | .      |
| Yes                                    | 2.091  | 0.822  | 5.318   | 0.122  |
| <b>MI or angina</b> (no)               | 1      | .      | .       | .      |
| Yes                                    | 2.588  | 0.067  | 100.67  | 0.611  |
| <b>MI</b> (no)¶                        | 1      | .      | .       | .      |
| Yes                                    | 0.398  | 0.017  | 9.467   | 0.569  |
| <b>Angina</b> (no)                     | 1      | .      | .       | .      |
| Yes                                    | 0.478  | 0.037  | 6.205   | 0.572  |
| <b>Arthritis</b> (no)                  | 1      | .      | .       | .      |
| Yes                                    | 0.478  | 0.037  | 6.205   | 0.572  |
| <b>Osteoarthritis</b> (no)             | 1      | .      | .       | .      |
| yes                                    | 1.290  | 0.102  | 16.314  | 0.844  |
| <b>Rheumatoid arthritis</b> (no)       | 1      | .      | .       | .      |
| Yes                                    | 2.476  | 0.211  | 29.049  | 0.471  |
| <b>Kidney failure</b> (no)             | 1      | .      | .       | .      |
| Yes                                    | 1.378  | 0.247  | 7.697   | 0.715  |
| <b>Depression</b> (no)                 | 1      | .      | .       | .      |
| Yes                                    | 1.507  | 0.951  | 2.388   | 0.081  |

|                                                   |          |                             |          |       |
|---------------------------------------------------|----------|-----------------------------|----------|-------|
| <b>Thyroid disease</b> ( <i>no</i> )              | 1        | .                           | .        | .     |
| <i>Yes</i>                                        | 0.936    | 0.530                       | 1.655    | 0.821 |
| <b>Asthma</b> ( <i>no</i> )                       | 1        | .                           | .        | .     |
| <i>Yes</i>                                        | 0.923    | 0.473                       | 1.804    | 0.816 |
| <b>Green vegetable consumption</b> ( <i>low</i> ) | 1        | .                           | .        | .     |
| <i>High</i>                                       | 1.053    | 0.829                       | 1.337    | 0.674 |
| <b>White vegetable consumption</b> ( <i>low</i> ) | 1        | .                           | .        | .     |
| <i>High</i>                                       | 1.009    | 0.777                       | 1.310    | 0.947 |
| <b>Fruit consumption</b> ( <i>low</i> )           | 1        | .                           | .        | .     |
| <i>High</i>                                       | 0.905    | 0.721                       | 1.137    | 0.390 |
| <b>Mean dependent var</b>                         | 0.169    | <b>SD dependent var</b>     | 0.375    |       |
| <b>Pseudo r-squared</b>                           | 0.327    | <b>Number of obs</b>        | 3948     |       |
| <b>Chi-square</b>                                 | 1176.431 | <b>Prob &gt; chi2</b>       | 0.000    |       |
| <b>Akaike crit. (AIC)</b>                         | 2508.388 | <b>Bayesian crit. (BIC)</b> | 2797.313 |       |

MI: myocardial infarction

**Table S2.** Adjusted ORs for serum mercury (Hg).

| <b>Metabolic Syndrome</b>                                | <b>Odds ratio</b> | <b>95% Confident Interval</b> |        | <b>p-value</b> |
|----------------------------------------------------------|-------------------|-------------------------------|--------|----------------|
| <b>Serum Hg (<math>\mu\text{g/L}</math>)</b>             | 1.033             | 1.021                         | 1.064  | 0.031          |
| <b>Monthly household income (&lt;2,000)</b>              | 1 (Ref)           | .                             | .      | .              |
| $\geq 2,000$ and < 4,000                                 | 0.949             | 0.714                         | 1.262  | 0.718          |
| $\geq 4,000$ and < 6,000                                 | 0.827             | 0.600                         | 1.141  | 0.248          |
| $\geq 6,000$                                             | 0.698             | 0.493                         | 0.988  | 0.043          |
| <b>Residential areas (urban)</b>                         | 1                 | .                             | .      | .              |
| <i>Rural</i>                                             | 1.182             | 0.899                         | 1.555  | 0.232          |
| <b>Energy (Kcal)</b>                                     | 1                 | 1                             | 1      | 0.944          |
| <b>Age group (29 years)</b>                              | 1                 | .                             | .      | .              |
| 30-39                                                    | 2.253             | 1.34                          | 3.786  | 0.002          |
| 40-49                                                    | 5.839             | 3.586                         | 9.507  | <0.001         |
| 50-59                                                    | 6.798             | 4.090                         | 11.297 | <0.001         |
| >60                                                      | 8.042             | 4.576                         | 14.133 | <0.001         |
| <b>Occupation</b>                                        | 1                 | .                             | .      | .              |
| <i>(Managers, professional)</i>                          |                   |                               |        |                |
| <i>Office worker, clerical workers</i>                   | 0.967             | 0.620                         | 1.506  | 0.880          |
| <i>Service workers, sales workers</i>                    | 0.996             | 0.663                         | 1.495  | 0.984          |
| <i>Agriculture, forestry and fishing workers</i>         | 0.756             | 0.421                         | 1.358  | 0.349          |
| <i>Craft, plant and machine operators and assemblers</i> | 0.616             | 0.384                         | 0.989  | 0.045          |
| <i>Elementary occupations</i>                            | 0.798             | 0.494                         | 1.288  | 0.355          |
| <i>Unemployed</i>                                        | 0.919             | 0.634                         | 1.332  | 0.656          |
| <b>Sex (male)</b>                                        | 1                 | .                             | .      | .              |
| <i>Female</i>                                            | 3.911             | 2.851                         | 5.364  | <0.001         |
| <b>Family history of CVDs (no)</b>                       | 1                 | .                             | .      | .              |
| <i>Yes</i>                                               | 1.274             | 1.027                         | 1.581  | 0.028          |
| <b>Family history of type 2 diabetes (no)</b>            | 1                 | .                             | .      | .              |
| <i>Yes</i>                                               | 1.007             | 0.792                         | 1.281  | 0.954          |
| <b>Family history of hyperlipidemia (no)</b>             | 1                 | .                             | .      | .              |
| <i>Yes</i>                                               | 1.143             | 0.764                         | 1.711  | 0.515          |
| <b>BMI group (&lt;18.5)</b>                              | 1                 | .                             | .      | .              |
| $\geq 18.5$ and < 25                                     | 4.056             | 1.163                         | 14.148 | 0.028          |
| $\geq 25$ and < 30                                       | 20.48             | 5.846                         | 71.74  | <0.001         |

|                                                 |        |        |         |        |
|-------------------------------------------------|--------|--------|---------|--------|
| $\geq 30$                                       | 48.913 | 13.367 | 178.99  | <0.001 |
| <b>Smoking status</b> ( <i>non/ex-smoker</i> )  | 1      | .      | .       | .      |
| Current smoker                                  | 1.237  | 0.907  | 1.687   | 0.178  |
| <b>High risk drinking</b> ( <i>no</i> )         | 1      | .      | .       | .      |
| Yes                                             | 0.965  | 0.699  | 1.331   | 0.826  |
| <b>Physical activity</b> ( <i>Not regular</i> ) | 1      | .      | .       | .      |
| Regular                                         | 0.859  | 0.667  | 1.105   | 0.235  |
| <b>Education level</b>                          | 1      | .      | .       | .      |
| ( $\leq$ Middle school)                         |        |        |         |        |
| High school                                     | 0.972  | 0.726  | 1.302   | 0.851  |
| $\geq$ College                                  | 0.513  | 0.358  | 0.735   | <0.001 |
| <b>Hypertension</b> ( <i>no</i> )               | 1      | .      | .       | .      |
| yes                                             | 3.64   | 2.719  | 4.872   | <0.001 |
| <b>Dyslipidemia</b> ( <i>no</i> )               | 1      | .      | .       | .      |
| Yes                                             | 2.262  | 1.676  | 3.053   | <0.001 |
| <b>Diabetes</b> ( <i>no</i> )                   | 1      | .      | .       | .      |
| Yes                                             | 3.079  | 2.001  | 4.737   | <0.001 |
| <b>Stroke</b> ( <i>no</i> )                     | 1      | .      | .       | .      |
| Yes                                             | 2.165  | 0.844  | 5.554   | 0.108  |
| <b>MI or angina</b> ( <i>no</i> )               | 1      | .      | .       | .      |
| Yes                                             | 2.785  | 0.072  | 107.683 | 0.583  |
| <b>MI</b> ( <i>no</i> ) <sup>¶</sup>            | 1      | .      | .       | .      |
| Yes                                             | 0.433  | 0.019  | 10.067  | 0.602  |
| <b>Angina</b> ( <i>no</i> )                     | 1      | .      | .       | .      |
| Yes                                             | 0.478  | 0.015  | 14.867  | 0.674  |
| <b>Arthritis</b> ( <i>no</i> )                  | 1      | .      | .       | .      |
| Yes                                             | 0.556  | 0.046  | 6.746   | 0.645  |
| <b>Osteoarthritis</b> ( <i>no</i> )             | 1      | .      | .       | .      |
| yes                                             | 1.110  | 0.094  | 13.122  | 0.934  |
| <b>Rheumatoid arthritis</b> ( <i>no</i> )       | 1      | .      | .       | .      |
| Yes                                             | 2.146  | 0.196  | 23.506  | 0.532  |
| <b>Kidney failure</b> ( <i>no</i> )             | 1      | .      | .       | .      |
| Yes                                             | 1.326  | 0.236  | 7.468   | 0.749  |
| <b>Depression</b> ( <i>no</i> )                 | 1      | .      | .       | .      |
| Yes                                             | 1.480  | 0.935  | 2.342   | 0.094  |
| <b>Thyroid disease</b> ( <i>no</i> )            | 1      | .      | .       | .      |
| Yes                                             | 0.919  | 0.521  | 1.622   | 0.771  |
| <b>Asthma</b> ( <i>no</i> )                     | 1      | .      | .       | .      |
| Yes                                             | 0.930  | 0.478  | 1.808   | 0.830  |

|                                                   |          |                             |          |       |
|---------------------------------------------------|----------|-----------------------------|----------|-------|
| <b>Green vegetable consumption</b> ( <i>low</i> ) | 1        | .                           | .        | .     |
| <i>High</i>                                       | 1.055    | 0.831                       | 1.340    | 0.661 |
| <b>White vegetable consumption</b> ( <i>low</i> ) | 1        | .                           | .        | .     |
| <i>High</i>                                       | 0.995    | 0.766                       | 1.292    | 0.970 |
| <b>Fruit consumption</b> ( <i>low</i> )           | 1        | .                           | .        | .     |
| <i>High</i>                                       | 0.902    | 0.718                       | 1.133    | 0.375 |
| <b>Mean dependent var</b>                         | 0.169    | <b>SD dependent var</b>     | 0.375    |       |
| <b>Pseudo r-squared</b>                           | 0.327    | <b>Number of obs</b>        | 3948     |       |
| <b>Chi-square</b>                                 | 1175.198 | <b>Prob &gt; chi2</b>       | 0.000    |       |
| <b>Akaike crit. (AIC)</b>                         | 2509.621 | <b>Bayesian crit. (BIC)</b> | 2798.545 |       |

MI: myocardial infarction

**Table S3.** Adjusted ORs for serum c-reactive protein (CRP).

| <b>Metabolic Syndrome</b>                                | <b>Odds ratio</b> | <b>95% Confident Interval</b> |         | <b>p-value</b> |
|----------------------------------------------------------|-------------------|-------------------------------|---------|----------------|
| <b>Serum CRP (mg/L)</b>                                  | 1.089             | 1.036                         | 1.144   | 0.001          |
| <b>Monthly household income (&lt;2,000)</b>              | 1                 | .                             | .       | .              |
| ≥ 2,000 and < 4,000                                      | 1.041             | 0.718                         | 1.509   | 0.833          |
| ≥ 4,000 and < 6,000                                      | 0.904             | 0.611                         | 1.338   | 0.615          |
| ≥ 6,000                                                  | 0.804             | 0.538                         | 1.202   | 0.288          |
| <b>Residential areas (urban)</b>                         | 1                 | .                             | .       | .              |
| <i>Rural</i>                                             | 1.019             | 0.744                         | 1.395   | 0.906          |
| <b>Energy (Kcal)</b>                                     | 1                 | 1                             | 1       | 0.579          |
| <b>Age group (29 years)</b>                              | 1                 | .                             | .       | .              |
| 30-39                                                    | 2.36              | 1.286                         | 4.334   | 0.006          |
| 40-49                                                    | 4.927             | 2.739                         | 8.862   | <0.001         |
| 50-59                                                    | 5.794             | 3.165                         | 10.608  | <0.001         |
| >60                                                      | 5.451             | 2.771                         | 10.723  | <0.001         |
| <b>Occupation</b>                                        | 1                 | .                             | .       | .              |
| <i>(Managers, professional)</i>                          |                   |                               |         |                |
| <i>Office worker, clerical workers</i>                   | 0.979             | 0.612                         | 1.566   | 0.930          |
| <i>Service workers, sales workers</i>                    | 0.878             | 0.552                         | 1.395   | 0.582          |
| <i>Agriculture, forestry and fishing workers</i>         | 0.962             | 0.443                         | 2.088   | 0.922          |
| <i>Craft, plant and machine operators and assemblers</i> | 0.964             | 0.575                         | 1.614   | 0.889          |
| <i>Elementary occupations</i>                            | 0.897             | 0.512                         | 1.572   | 0.704          |
| <i>Unemployed</i>                                        | 1.024             | 0.687                         | 1.527   | 0.906          |
| <b>Sex (male)</b>                                        | 1                 | .                             | .       | .              |
| <i>Female</i>                                            | 3.84              | 2.676                         | 5.511   | <0.001         |
| <b>Family history of CVDs (no)</b>                       | 1                 | .                             | .       | .              |
| <i>Yes</i>                                               | 1.287             | 1.003                         | 1.652   | 0.048          |
| <b>Family history of type 2 diabetes (no)</b>            | 1                 | .                             | .       | .              |
| <i>Yes</i>                                               | 1.249             | .968                          | 1.610   | 0.087          |
| <b>Family history of hyperlipidemia (no)</b>             | 1                 | .                             | .       | .              |
| <i>Yes</i>                                               | .933              | .637                          | 1.368   | 0.724          |
| <b>BMI group (&lt;18.5)</b>                              | 1                 | .                             | .       | .              |
| ≥ 18.5 and < 25                                          | 4.447             | 0.996                         | 19.86   | 0.051          |
| ≥ 25 and < 30                                            | 23.179            | 5.176                         | 103.808 | <0.001         |
| ≥ 30                                                     | 50.156            | 10.791                        | 233.125 | <0.001         |
| <b>Smoking status (non/ex-smoker)</b>                    | 1                 | .                             | .       | .              |

|                                          |        |       |         |        |
|------------------------------------------|--------|-------|---------|--------|
| <i>Current smoker</i>                    | 1.662  | 1.170 | 2.306   | 0.005  |
| <b>High risk drinking (no)</b>           | 1      | .     | .       | .      |
| <i>Yes</i>                               | 0.761  | 0.525 | 1.103   | 0.149  |
| <b>Physical activity (Not regular)</b>   | 1      | .     | .       | .      |
| <i>Regular</i>                           | 0.997  | 0.755 | 1.315   | 0.981  |
| <b>Education level</b>                   | 1      | .     | .       | .      |
| <i>(≤ Middle school)</i>                 |        |       |         |        |
| <i>High school</i>                       | 1.116  | 0.778 | 1.601   | 0.549  |
| <i>&gt;= College</i>                     | .683   | 0.450 | 1.037   | 0.073  |
| <b>Hypertension (no)</b>                 | 1      | .     | .       | .      |
| <i>yes</i>                               | 4.477  | 3.248 | 6.170   | <0.001 |
| <b>Dyslipidemia (no)</b>                 | 1      | .     | .       | .      |
| <i>Yes</i>                               | 2.307  | 1.67  | 3.187   | <0.001 |
| <b>Diabetes (no)</b>                     | 1      | .     | .       | .      |
| <i>Yes</i>                               | 3.909  | 2.372 | 6.441   | <0.001 |
| <b>Stroke (no)</b>                       | 1      | .     | .       | .      |
| <i>Yes</i>                               | 1.711  | 0.569 | 5.147   | 0.339  |
| <b>MI or angina (no)</b>                 | 1      | .     | .       | .      |
| <i>Yes</i>                               | 4.891  | 0.049 | 486.909 | 0.499  |
| <b>MI (no)¶</b>                          | 1      | .     | .       | .      |
| <i>Yes</i>                               | 0.036  | 0.001 | 1.333   | 0.071  |
| <b>Angina (no)</b>                       | 1      | .     | .       | .      |
| <i>Yes</i>                               | 0.301  | 0.004 | 23.762  | 0.590  |
| <b>Arthritis (no)</b>                    | 1      | .     | .       | .      |
| <i>Yes</i>                               | 0.071  | 0.005 | 1.045   | 0.054  |
| <b>Osteoarthritis (no)</b>               | 1      | .     | .       | .      |
| <i>yes</i>                               | 7.810  | 0.549 | 111.192 | 0.129  |
| <b>Rheumatoid arthritis (no)</b>         | 1      | .     | .       | .      |
| <i>Yes</i>                               | 13.615 | 1.116 | 166.046 | 0.041  |
| <b>Kidney failure (no)</b>               | 1      | .     | .       | .      |
| <i>Yes</i>                               | 0.022  | 0.001 | 0.349   | 0.007  |
| <b>Depression (no)</b>                   | 1      | .     | .       | .      |
| <i>Yes</i>                               | 1.447  | 0.843 | 2.484   | 0.180  |
| <b>Thyroid disease (no)</b>              | 1      | .     | .       | .      |
| <i>Yes</i>                               | 1.704  | 1.005 | 2.887   | 0.048  |
| <b>Asthma (no)</b>                       | 1      | .     | .       | .      |
| <i>Yes</i>                               | 1.536  | 0.723 | 3.262   | 0.264  |
| <b>Green vegetable consumption (low)</b> | 1      | .     | .       | .      |
| <i>High</i>                              | 1.117  | 0.851 | 1.466   | 0.424  |

|                                                   |          |                             |       |          |
|---------------------------------------------------|----------|-----------------------------|-------|----------|
| <b>White vegetable consumption</b> ( <i>low</i> ) | 1        | .                           | .     | .        |
| <i>High</i>                                       | 0.855    | 0.632                       | 1.158 | 0.311    |
| <b>Fruit consumption</b> ( <i>low</i> )           | 1        | .                           | .     | .        |
| <i>High</i>                                       | 0.844    | 0.647                       | 1.102 | 0.213    |
| <b>Mean dependent var</b>                         | 0.188    | <b>SD dependent var</b>     |       | 0.391    |
| <b>Pseudo r-squared</b>                           | 0.328    | <b>Number of obs</b>        |       | 2888     |
| <b>Chi-square</b>                                 | 914.365  | <b>Prob &gt; chi2</b>       |       | 0.000    |
| <b>Akaike crit. (AIC)</b>                         | 1966.468 | <b>Bayesian crit. (BIC)</b> |       | 2241.011 |

**Table S4.** Adjusted ORs for vitamin B1 intake.

| <b>Metabolic Syndrome</b>                                | <b>Odds ratio</b> | <b>95% Confident Interval</b> |         | <b>p-value</b> |
|----------------------------------------------------------|-------------------|-------------------------------|---------|----------------|
| <b>Vitamin B1 intake (mg)</b>                            | 0.884             | 0.792                         | 0.974   | 0.013          |
| <b>Monthly household income (&lt;2,000)</b>              | 1                 | .                             | .       | .              |
| ≥ 2,000 and < 4,000                                      | 0.900             | 0.745                         | 1.086   | 0.271          |
| ≥ 4,000 and < 6,000                                      | .847              | 0.687                         | 1.043   | 0.118          |
| ≥ 6,000                                                  | .732              | 0.583                         | 0.918   | 0.007          |
| <b>Residential areas (urban)</b>                         | 1                 | .                             | .       | .              |
| <i>Rural</i>                                             | 1.121             | .939                          | 1.339   | 0.207          |
| <b>Energy (Kcal)</b>                                     | 1                 | 1                             | 1       | 0.071          |
| <b>Age group (29 years)</b>                              | 1                 | .                             | .       | .              |
| 30-39                                                    | 2.430             | 1.685                         | 3.503   | <0.001         |
| 40-49                                                    | 5.029             | 3.544                         | 7.138   | <0.001         |
| 50-59                                                    | 6.687             | 4.666                         | 9.585   | <0.001         |
| >60                                                      | 7.173             | 4.835                         | 10.641  | <0.001         |
| <b>Occupation</b>                                        | 1                 | .                             | .       | .              |
| <i>(Managers, professional)</i>                          |                   |                               |         |                |
| <i>Office worker, clerical workers</i>                   | 1.106             | 0.829                         | 1.476   | 0.494          |
| <i>Service workers, sales workers</i>                    | 1.051             | 0.804                         | 1.374   | 0.715          |
| <i>Agriculture, forestry and fishing workers</i>         | 0.905             | 0.613                         | 1.334   | 0.613          |
| <i>Craft, plant and machine operators and assemblers</i> | 0.896             | 0.659                         | 1.219   | 0.486          |
| <i>Elementary occupations</i>                            | 0.776             | 0.564                         | 1.069   | 0.121          |
| <i>Unemployed</i>                                        | 0.979             | 0.769                         | 1.246   | 0.861          |
| <b>Sex (male)</b>                                        | 1                 | .                             | .       | .              |
| <i>Female</i>                                            | 3.939             | 3.202                         | 4.846   | <0.001         |
| <b>Family history of CVDs (no)</b>                       | 1                 | .                             | .       | .              |
| <i>Yes</i>                                               | 1.089             | .947                          | 1.252   | 0.232          |
| <b>Family history of type 2 diabetes (no)</b>            | 1                 | .                             | .       | .              |
| <i>Yes</i>                                               | 1.169             | 1.002                         | 1.364   | 0.048          |
| <b>Family history of hyperlipidemia (no)</b>             | 1                 | .                             | .       | .              |
| <i>Yes</i>                                               | 1.059             | 0.818                         | 1.371   | 0.665          |
| <b>BMI group (&lt;18.5)</b>                              | 1                 | .                             | .       | .              |
| ≥ 18.5 and < 25                                          | 8.748             | 2.743                         | 27.896  | <0.001         |
| ≥ 25 and < 30                                            | 43.398            | 13.587                        | 138.614 | <0.001         |

|                                                 |        |        |         |        |
|-------------------------------------------------|--------|--------|---------|--------|
| $\geq 30$                                       | 113.66 | 34.857 | 370.624 | <0.001 |
| <b>Smoking status</b> ( <i>non/ex-smoker</i> )  | 1      | .      | .       | .      |
| Current smoker                                  | 1.282  | 1.045  | 1.575   | 0.017  |
| <b>High risk drinking</b> ( <i>no</i> )         | 1      | .      | .       | .      |
| Yes                                             | 0.976  | 0.792  | 1.204   | 0.822  |
| <b>Physical activity</b> ( <i>Not regular</i> ) | 1      | .      | .       | .      |
| Regular                                         | 0.905  | 0.771  | 1.062   | 0.221  |
| <b>Education level</b>                          | 1      | .      | .       | .      |
| ( $\leq$ Middle school)                         |        |        |         |        |
| High school                                     | 0.939  | 0.775  | 1.138   | 0.523  |
| $\geq$ College                                  | 0.615  | 0.486  | 0.779   | <0.001 |
| <b>Hypertension</b> ( <i>no</i> )               | 1      | .      | .       | .      |
| yes                                             | 3.98   | 3.321  | 4.770   | <0.001 |
| <b>Dyslipidemia</b> ( <i>no</i> )               | 1      | .      | .       | .      |
| Yes                                             | 2.388  | 1.968  | 2.898   | <0.001 |
| <b>Diabetes</b> ( <i>no</i> )                   | 1      | .      | .       | .      |
| Yes                                             | 3.53   | 2.677  | 4.653   | <0.001 |
| <b>Stroke</b> ( <i>no</i> )                     | 1      | .      | .       | .      |
| Yes                                             | 1.019  | 0.587  | 1.767   | 0.947  |
| <b>MI or angina</b> ( <i>no</i> )               | 1      | .      | .       | .      |
| Yes                                             | 0.260  | 0.020  | 3.333   | 0.301  |
| <b>MI</b> ( <i>no</i> ) <sup>¶</sup>            | 1      | .      | .       | .      |
| Yes                                             | 1.693  | 0.189  | 15.146  | 0.638  |
| <b>Angina</b> ( <i>no</i> )                     | 1      | .      | .       | .      |
| Yes                                             | 4.328  | 0.371  | 50.546  | 0.243  |
| <b>Arthritis</b> ( <i>no</i> )                  | 1      | .      | .       | .      |
| Yes                                             | 0.119  | 0.029  | .489    | 0.003  |
| <b>Osteoarthritis</b> ( <i>no</i> )             | 1      | .      | .       | .      |
| yes                                             | 6.240  | 1.548  | 25.151  | 0.010  |
| <b>Rheumatoid arthritis</b> ( <i>no</i> )       | 1      | .      | .       | .      |
| Yes                                             | 6.403  | 1.732  | 23.677  | 0.005  |
| <b>Kidney failure</b> ( <i>no</i> )             | 1      | .      | .       | .      |
| Yes                                             | 0.838  | 0.353  | 1.991   | 0.689  |
| <b>Depression</b> ( <i>no</i> )                 | 1      | .      | .       | .      |
| Yes                                             | 1.499  | 1.111  | 2.022   | 0.008  |
| <b>Thyroid disease</b> ( <i>no</i> )            | 1      | .      | .       | .      |
| Yes                                             | 1.376  | 1.009  | 1.878   | 0.044  |
| <b>Asthma</b> ( <i>no</i> )                     | 1      | .      | .       | .      |
| Yes                                             | 1.173  | 0.770  | 1.788   | 0.456  |

|                                                   |          |                             |          |       |
|---------------------------------------------------|----------|-----------------------------|----------|-------|
| <b>Green vegetable consumption</b> ( <i>low</i> ) | 1        | .                           | .        | .     |
| <i>High</i>                                       | 1.043    | 0.894                       | 1.217    | 0.591 |
| <b>White vegetable consumption</b> ( <i>low</i> ) | 1        | .                           | .        | .     |
| <i>High</i>                                       | 0.904    | 0.764                       | 1.070    | 0.240 |
| <b>Fruit consumption</b> ( <i>low</i> )           | 1        | .                           | .        | .     |
| <i>High</i>                                       | 0.873    | 0.754                       | 1.010    | 0.068 |
| <b>Mean dependent var</b>                         | 0.180    | <b>SD dependent var</b>     | 0.384    |       |
| <b>Pseudo r-squared</b>                           | 0.324    | <b>Number of obs</b>        | 8944     |       |
| <b>Chi-square</b>                                 | 2734.303 | <b>Prob &gt; chi2</b>       | 0.000    |       |
| <b>Akaike crit. (AIC)</b>                         | 5793.258 | <b>Bayesian crit. (BIC)</b> | 6119.800 |       |

**Table S5.** Adjusted ORs for vitamin C intake.

| <b>Metabolic Syndrome</b>                                | <b>Odds ratio</b> | <b>95% Confident Interval</b> |        | <b>p-value</b> |
|----------------------------------------------------------|-------------------|-------------------------------|--------|----------------|
| <b>Vitamin C intake (mg)</b>                             | 0.991             | 0.982                         | 0.994  | 0.032          |
| <b>Monthly household income</b>                          | 1                 | .                             | .      | .              |
| ( <i>&lt;2,000</i> )                                     |                   |                               |        |                |
| <i>≥ 2,000 and &lt; 4,000</i>                            | 0.906             | 0.751                         | 1.094  | 0.306          |
| <i>≥ 4,000 and &lt; 6,000</i>                            | .855              | .694                          | 1.053  | 0.140          |
| <i>≥ 6,000</i>                                           | .743              | .592                          | .932   | 0.010          |
| <b>Residential areas (urban)</b>                         | 1                 | .                             | .      | .              |
| <i>Rural</i>                                             | 1.115             | 0.934                         | 1.331  | 0.228          |
| <b>Energy (Kcal)</b>                                     | 1                 | 1                             | 1      | 0.420          |
| <b>Age group (29 years)</b>                              | 1                 | .                             | .      | .              |
| <i>30-39</i>                                             | 2.443             | 1.694                         | 3.521  | <0.001         |
| <i>40-49</i>                                             | 5.084             | 3.582                         | 7.217  | <0.001         |
| <i>50-59</i>                                             | 6.839             | 4.768                         | 9.811  | <0.001         |
| <i>&gt;60</i>                                            | 7.382             | 4.972                         | 10.96  | <0.001         |
| <b>Occupation</b>                                        | 1                 | .                             | .      | .              |
| ( <i>Managers, professional</i> )                        |                   |                               |        |                |
| <i>Office worker, clerical workers</i>                   | 1.113             | 0.834                         | 1.486  | 0.466          |
| <i>Service workers, sales workers</i>                    | 1.048             | 0.802                         | 1.371  | 0.730          |
| <i>Agriculture, forestry and fishing workers</i>         | 0.919             | 0.623                         | 1.355  | 0.669          |
| <i>Craft, plant and machine operators and assemblers</i> | 0.891             | 0.655                         | 1.213  | 0.464          |
| <i>Elementary occupations</i>                            | .771              | 0.560                         | 1.062  | 0.111          |
| <i>Unemployed</i>                                        | 0.98              | 0.770                         | 1.248  | 0.871          |
| <b>Sex (male)</b>                                        | 1                 | .                             | .      | .              |
| <i>Female</i>                                            | 4.017             | 3.263                         | 4.945  | <0.001         |
| <b>Family history of CVDs (no)</b>                       | 1                 | .                             | .      | .              |
| <i>Yes</i>                                               | 1.089             | 0.947                         | 1.252  | 0.232          |
| <b>Family history of type 2 diabetes (no)</b>            | 1                 | .                             | .      | .              |
| <i>Yes</i>                                               | 1.165             | 0.998                         | 1.359  | 0.053          |
| <b>Family history of hyperlipidemia (no)</b>             | 1                 | .                             | .      | .              |
| <i>Yes</i>                                               | 1.068             | 0.825                         | 1.382  | 0.619          |
| <b>BMI group (&lt;18.5)</b>                              | 1                 | .                             | .      | .              |
| <i>≥ 18.5 and &lt; 25</i>                                | 8.813             | 2.763                         | 28.117 | <0.001         |

|                                                 |         |        |         |        |
|-------------------------------------------------|---------|--------|---------|--------|
| $\geq 25$ and $< 30$                            | 43.807  | 13.709 | 139.985 | <0.001 |
| $\geq 30$                                       | 113.145 | 34.685 | 369.083 | <0.001 |
| <b>Smoking status</b> ( <i>non/ex-smoker</i> )  | 1       | .      | .       | .      |
| Current smoker                                  | 1.279   | 1.042  | 1.571   | 0.019  |
| <b>High risk drinking</b> ( <i>no</i> )         | 1       | .      | .       | .      |
| Yes                                             | 0.966   | 0.784  | 1.191   | 0.748  |
| <b>Physical activity</b> ( <i>Not regular</i> ) | 1       | .      | .       | .      |
| Regular                                         | 0.910   | 0.775  | 1.068   | 0.248  |
| <b>Education level</b>                          | 1       | .      | .       | .      |
| ( $\leq$ Middle school)                         |         |        |         |        |
| High school                                     | 0.945   | 0.780  | 1.146   | 0.565  |
| $\geq$ College                                  | 0.619   | 0.488  | 0.784   | <0.001 |
| <b>Hypertension</b> ( <i>no</i> )               | 1       | .      | .       | .      |
| yes                                             | 3.97    | 3.313  | 4.758   | <0.001 |
| <b>Dyslipidemia</b> ( <i>no</i> )               | 1       | .      | .       | .      |
| Yes                                             | 2.393   | 1.972  | 2.904   | <0.001 |
| <b>Diabetes</b> ( <i>no</i> )                   | 1       | .      | .       | .      |
| Yes                                             | 3.524   | 2.674  | 4.645   | <0.001 |
| <b>Stroke</b> ( <i>no</i> )                     | 1       | .      | .       | .      |
| Yes                                             | 1.019   | 0.587  | 1.767   | 0.948  |
| <b>MI or angina</b> ( <i>no</i> )               | 1       | .      | .       | .      |
| Yes                                             | 0.264   | 0.020  | 3.411   | 0.308  |
| <b>MI</b> ( <i>no</i> ) <sup>¶</sup>            | 1       | .      | .       | .      |
| Yes                                             | 1.677   | 0.187  | 15.069  | 0.645  |
| <b>Angina</b> ( <i>no</i> )                     | 1       | .      | .       | .      |
| Yes                                             | 4.347   | 0.369  | 51.17   | 0.243  |
| <b>Arthritis</b> ( <i>no</i> )                  | 1       | .      | .       | .      |
| Yes                                             | 0.127   | 0.031  | .518    | 0.004  |
| <b>Osteoarthritis</b> ( <i>no</i> )             | 1       | .      | .       | .      |
| yes                                             | 5.865   | 1.463  | 23.519  | 0.013  |
| <b>Rheumatoid arthritis</b> ( <i>no</i> )       | 1       | .      | .       | .      |
| Yes                                             | 6.096   | 1.655  | 22.458  | 0.007  |
| <b>Kidney failure</b> ( <i>no</i> )             | 1       | .      | .       | .      |
| Yes                                             | 0.841   | 0.355  | 1.995   | 0.695  |
| <b>Depression</b> ( <i>no</i> )                 | 1       | .      | .       | .      |
| Yes                                             | 1.505   | 1.116  | 2.031   | 0.007  |
| <b>Thyroid disease</b> ( <i>no</i> )            | 1       | .      | .       | .      |
| Yes                                             | 1.395   | 1.022  | 1.903   | 0.036  |
| <b>Asthma</b> ( <i>no</i> )                     | 1       | .      | .       | .      |

|                                                   |          |                             |          |       |
|---------------------------------------------------|----------|-----------------------------|----------|-------|
| <i>Yes</i>                                        | 1.167    | 0.766                       | 1.778    | 0.472 |
| <b>Green vegetable consumption</b> ( <i>low</i> ) | 1        | .                           | .        | .     |
| <i>High</i>                                       | 1.043    | 0.893                       | 1.217    | 0.596 |
| <b>White vegetable consumption</b> ( <i>low</i> ) | 1        | .                           | .        | .     |
| <i>High</i>                                       | 0.908    | 0.768                       | 1.075    | 0.263 |
| <b>Fruit consumption</b> ( <i>low</i> )           | 1        | .                           | .        | .     |
| <i>High</i>                                       | 0.872    | 0.753                       | 1.009    | 0.066 |
| <b>Mean dependent var</b>                         | 0.180    | <b>SD dependent var</b>     | 0.384    |       |
| <b>Pseudo r-squared</b>                           | 0.324    | <b>Number of obs</b>        | 8944     |       |
| <b>Chi-square</b>                                 | 2732.715 | <b>Prob &gt; chi2</b>       | 0.000    |       |
| <b>Akaike crit. (AIC)</b>                         | 5794.846 | <b>Bayesian crit. (BIC)</b> | 6121.388 |       |

**Table S6.** Adjusted ORs for curry consumption.

| <b>Metabolic Syndrome</b>                              | <b>Odds ratio</b> | <b>95% Confident Interval</b> |         | <b>p-value</b> |
|--------------------------------------------------------|-------------------|-------------------------------|---------|----------------|
| <b>Curry consumption</b> ( <i>low</i> )                | 1 (refer)         | .                             | .       | .              |
| <i>High</i>                                            | 0.853             | 0.740                         | 0.983   | 0.028          |
| <b>Monthly household income</b> (<2,000)               | 1                 | .                             | .       | .              |
| $\geq 2,000$ and < 4,000                               | 0.907             | 0.751                         | 1.095   | 0.309          |
| $\geq 4,000$ and < 6,000                               | 0.851             | 0.691                         | 1.049   | 0.130          |
| $\geq 6,000$                                           | 0.733             | 0.585                         | 0.920   | 0.007          |
| <b>Residential areas</b> ( <i>urban</i> )              | 1                 | .                             | .       | .              |
| <i>Rural</i>                                           | 1.112             | 0.932                         | 1.328   | 0.240          |
| <b>Energy</b> (Kcal)                                   | 1.000             | 1.000                         | 1.000   | 0.842          |
| <b>Age group</b> (29 years)                            | 1                 | .                             | .       | .              |
| 30-39                                                  | 2.426             | 1.684                         | 3.495   | <0.001         |
| 40-49                                                  | 4.944             | 3.489                         | 7.005   | <0.001         |
| 50-59                                                  | 6.440             | 4.500                         | 9.216   | <0.001         |
| >60                                                    | 6.924             | 4.673                         | 10.261  | <0.001         |
| <b>Occupation</b>                                      | 1                 | .                             | .       | .              |
| (Managers, professional)                               |                   |                               |         |                |
| Office worker, clerical workers                        | 1.107             | 0.830                         | 1.477   | 0.489          |
| Service workers, sales workers                         | 1.047             | 0.801                         | 1.369   | 0.737          |
| Agriculture, forestry and fishing workers              | 0.904             | 0.613                         | 1.334   | 0.611          |
| Craft, plant and machine operators and assemblers      | 0.894             | 0.657                         | 1.215   | 0.474          |
| Elementary occupations                                 | 0.774             | 0.562                         | 1.065   | 0.116          |
| Unemployed                                             | 0.974             | 0.765                         | 1.239   | 0.828          |
| <b>Sex</b> ( <i>male</i> )                             | 1                 | .                             | .       | .              |
| <i>Female</i>                                          | 3.916             | 3.186                         | 4.813   | <0.001         |
| <b>Family history of CVDs</b> ( <i>no</i> )            | 1                 | .                             | .       | .              |
| <i>Yes</i>                                             | 1.086             | 0.945                         | 1.249   | 0.246          |
| <b>Family history of type 2 diabetes</b> ( <i>no</i> ) | 1                 | .                             | .       | .              |
| <i>Yes</i>                                             | 1.179             | 1.011                         | 1.376   | 0.036          |
| <b>Family history of hyperlipidemia</b> ( <i>no</i> )  | 1                 | .                             | .       | .              |
| <i>Yes</i>                                             | 1.068             | 0.825                         | 1.382   | 0.619          |
| <b>BMI group</b> (<18.5)                               | 1                 | .                             | .       | .              |
| $\geq 18.5$ and < 25                                   | 8.682             | 2.720                         | 27.711  | <0.001         |
| $\geq 25$ and < 30                                     | 43.12             | 13.488                        | 137.85  | <0.001         |
| $\geq 30$                                              | 112.002           | 34.32                         | 365.517 | <0.001         |

|                                                 |       |                         |        |        |
|-------------------------------------------------|-------|-------------------------|--------|--------|
| <b>Smoking status</b> ( <i>non/ex-smoker</i> )  | 1     | .                       | .      | .      |
| Current smoker                                  | 1.308 | 1.066                   | 1.605  | 0.010  |
| <b>High risk drinking</b> ( <i>no</i> )         | 1     | .                       | .      | .      |
| Yes                                             | 0.984 | 0.798                   | 1.213  | 0.879  |
| <b>Physical activity</b> ( <i>Not regular</i> ) | 1     | .                       | .      | .      |
| Regular                                         | 0.899 | 0.766                   | 1.055  | 0.192  |
| <b>Education level</b>                          | 1     | .                       | .      | .      |
| ( $\leq$ Middle school)                         |       |                         |        |        |
| High school                                     | 0.930 | 0.768                   | 1.127  | 0.460  |
| $\geq$ College                                  | 0.619 | 0.489                   | 0.784  | <0.001 |
| <b>Hypertension</b> ( <i>no</i> )               | 1     | .                       | .      | .      |
| yes                                             | 3.989 | 3.329                   | 4.780  | <0.001 |
| <b>Dyslipidemia</b> ( <i>no</i> )               | 1     | .                       | .      | .      |
| Yes                                             | 2.382 | 1.963                   | 2.89   | <0.001 |
| <b>Diabetes</b> ( <i>no</i> )                   | 1     | .                       | .      | .      |
| Yes                                             | 3.563 | 2.706                   | 4.691  | <0.001 |
| <b>Stroke</b> ( <i>no</i> )                     | 1     | .                       | .      | .      |
| Yes                                             | 1.014 | 0.586                   | 1.755  | 0.960  |
| <b>MI or angina</b> ( <i>no</i> )               | 1     | .                       | .      | .      |
| Yes                                             | 0.231 | 0.018                   | 2.902  | 0.256  |
| <b>MI</b> ( <i>no</i> ) <sup>¶</sup>            | 1     | .                       | .      | .      |
| Yes                                             | 1.905 | 0.217                   | 16.691 | 0.561  |
| <b>Angina</b> ( <i>no</i> )                     | 1     | .                       | .      | .      |
| Yes                                             | 4.751 | 0.415                   | 54.429 | 0.210  |
| <b>Arthritis</b> ( <i>no</i> )                  | 1     | .                       | .      | .      |
| Yes                                             | 0.124 | 0.030                   | 0.502  | 0.003  |
| <b>Osteoarthritis</b> ( <i>no</i> )             | 1     | .                       | .      | .      |
| yes                                             | 6.016 | 1.509                   | 23.988 | 0.011  |
| <b>Rheumatoid arthritis</b> ( <i>no</i> )       | 1     | .                       | .      | .      |
| Yes                                             | 6.16  | 1.682                   | 22.557 | 0.006  |
| <b>Kidney failure</b> ( <i>no</i> )             | 1     | .                       | .      | .      |
| Yes                                             | 0.848 | 0.359                   | 2.007  | 0.708  |
| <b>Depression</b> ( <i>no</i> )                 | 1     | .                       | .      | .      |
| Yes                                             | 1.497 | 1.109                   | 2.021  | 0.008  |
| <b>Thyroid disease</b> ( <i>no</i> )            | 1     | .                       | .      | .      |
| Yes                                             | 1.404 | 1.029                   | 1.914  | 0.032  |
| <b>Asthma</b> ( <i>no</i> )                     | 1     | .                       | .      | .      |
| Yes                                             | 1.169 | 0.767                   | 1.782  | 0.469  |
| <b>Mean dependent var</b>                       | 0.180 | <b>SD dependent var</b> |        | 0.384  |

|                           |          |                             |          |
|---------------------------|----------|-----------------------------|----------|
| <b>Pseudo r-squared</b>   | 0.323    | <b>Number of obs</b>        | 8944     |
| <b>Chi-square</b>         | 2726.634 | <b>Prob &gt; chi2</b>       | 0.000    |
| <b>Akaike crit. (AIC)</b> | 5794.927 | <b>Bayesian crit. (BIC)</b> | 6100.173 |

---
